# Supplementary material
Source: publisher figshare collection journal article supplement (https://gsajournals.figshare.com/articles/dataset/_/14501343)
Supplement: Supplementary file 1 [file 1]

**Table S1.** Summary of available data used in this study. The F2 SRX4791892 and SRX4929022 were removed from analysis because of too low coverage.

|            |                                                                  |
|------------|------------------------------------------------------------------|
| SRR7944839 | F2 Offspring of a PP1137xPP1134 F1 female backcrossed to PP1137  |
| SRR7945107 | F2 Offspring of a PP1137xPP1134 F1 female backcrossed to PP1137  |
| SRR7945239 | F2 Offspring of a PP1137xPP1134 F1 female backcrossed to PP1137  |
| SRR7947838 | F2 Offspring of a PP1137xPP1134 F1 female backcrossed to PP1137  |
| SRR7956996 | F2 Offspring of a PP1137xPP1134 F1 female backcrossed to PP1137  |
| SRR7958231 | F2 Offspring of a PP1137xPP1134 F1 female backcrossed to PP1137  |
| SRR7958238 | F2 Offspring of a PP1137xPP1134 F1 female backcrossed to PP1137  |
| SRR7962536 | F2 Offspring of a PP1137xPP1134 F1 female backcrossed to PP1137  |
| SRR8128382 | F2 Offspring of a PP1137xPP1134 F1 female backcrossed to PP1137  |
| SRR8128383 | F2 Offspring of a PP1137xPP1134 F1 female backcrossed to PP1137  |
| SRR8088302 | Female parent (F1 hybrid) from the PP1137xPP1134                 |
| SRR8088557 | PP1137 Male parent from the PP1137xPP1134                        |
| SRR8113329 | Male Grandparent used in a PP1137xPP1134                         |
| SRR8090239 | F2 Offspring of a PP1137xMSH177 F1 female backcrossed to PP1137  |
| SRR8098525 | F2 Offspring of a PP1137xMSH177 F1 female backcrossed to PP1137  |
| SRR8100068 | F2 Offspring of a PP1137xMSH177 F1 female backcrossed to PP1137  |
| SRR8100666 | F2 Offspring of a PP1137xMSH177 F1 female backcrossed to PP1137  |
| SRR8102104 | F2 Offspring of a PP1137xMSH177 F1 female backcrossed to PP1137  |
| SRR8101949 | F2 Offspring of a PP1137xMSH177 F1 female backcrossed to PP1137  |
| SRR8101948 | F2 Offspring of a PP1137xMSH177 F1 female backcrossed to PP1137  |
| SRR8102267 | F2 Offspring of a PP1137xMSH177 F1 female backcrossed to PP1137  |
| SRR8102268 | F2 Offspring of a PP1137xMSH177 F1 female backcrossed to PP1137  |
| SRR8102269 | F2 Offspring of a PP1137xMSH177 F1 female backcrossed to PP1137  |
| SRR8107633 | Female parent (F1 hybrid) from the PP1137xMSH177                 |
| SRR8107632 | PP1137 Male Parent used in a PP1137xMSH177                       |
| SRR8107631 | Male Grandparent used in a PP1137xMSH177                         |
| SRR8106727 | F2 Offspring of a PP1137xMSH1993 F1 female backcrossed to PP1137 |
| SRR8106726 | F2 Offspring of a PP1137xMSH1993 F1 female backcrossed to PP1137 |
| SRR8106729 | F2 Offspring of a PP1137xMSH1993 F1 female backcrossed to PP1137 |
| SRR8106728 | F2 Offspring of a PP1137xMSH1993 F1 female backcrossed to PP1137 |
| SRR8106725 | F2 Offspring of a PP1137xMSH1993 F1 female backcrossed to PP1137 |
| SRR8106724 | F2 Offspring of a PP1137xMSH1993 F1 female backcrossed to PP1137 |
| SRR8107333 | F2 Offspring of a PP1137xMSH1993 F1 female backcrossed to PP1137 |
| SRR8107334 | F2 Offspring of a PP1137xMSH1993 F1 female backcrossed to PP1137 |
| SRR8107335 | F2 Offspring of a PP1137xMSH1993 F1 female backcrossed to PP1137 |
| SRR8107336 | F2 Offspring of a PP1137xMSH1993 F1 female backcrossed to PP1137 |
| SRR8107332 | Female Grandparent used in a PP1137xMSH1993                      |
| SRR8107330 | Female parent (F1 hybrid) from the PP1137xMSH1993                |
| SRR8107331 | PP1137 Male Parent used in a PP1137xMSH1993                      |
| SRR330107  | <i>Drosophila pseudoobscura</i>                                  |
| SRR363439  | <i>Drosophila persimilis</i>                                     |
